# Supplementary material
Source: PubMed Central journal article supplement (PMC5993822)
Supplement: 41422_2018_23_MOESM4_ESM.pdf [file 41422_2018_23_MOESM4_ESM.pdf]

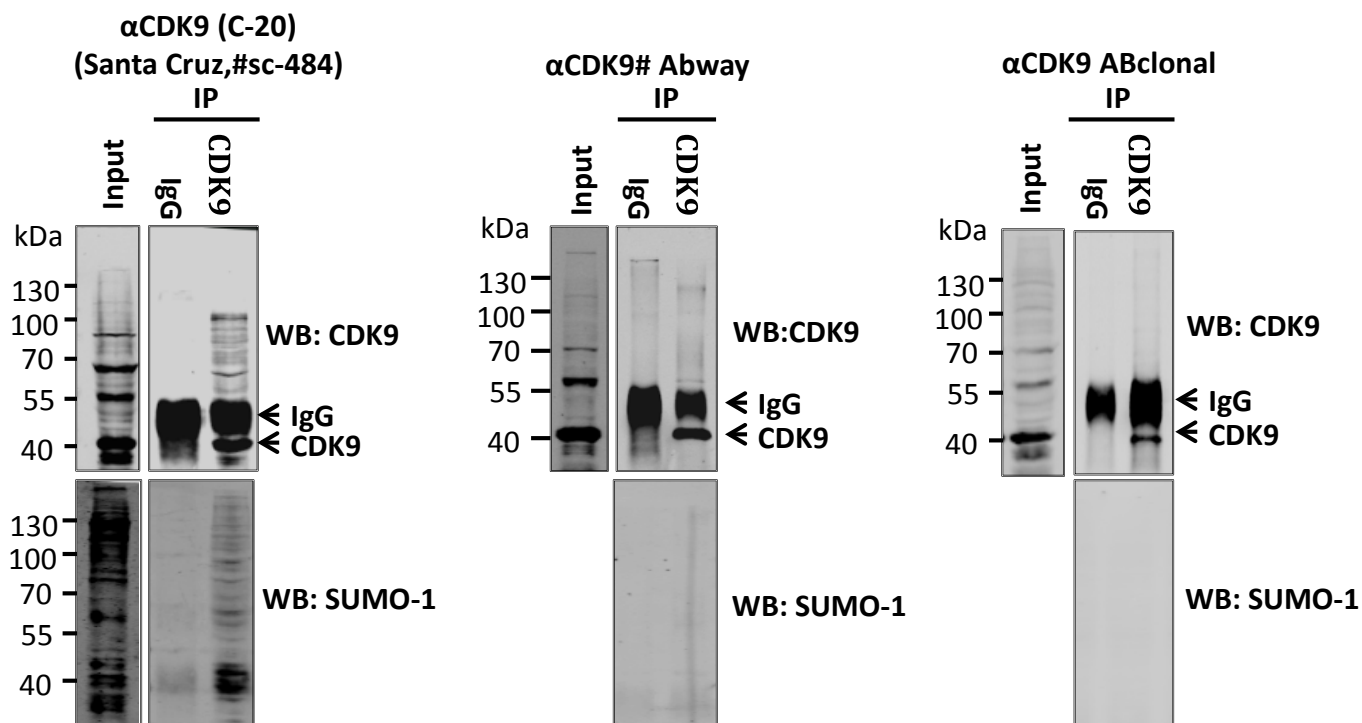

**Supplementary Figure 4.** Sumoylated CDK9 is generally refractory to IP with anti-CDK9 antibody. HeLa cell extracts were immunoprecipitated using various sources of CDK9 antibodies as indicated. The samples were run in duplicates and analyzed by Western blotting using the same CDK9 antibody used for IP and SUMO-1 antibody. Note that only Santa Cruz CDK9 (C-20) antibody was able to IP the sumoylated CDK9 (left panel).
