# Supplementary material
Source: PubMed Central journal article supplement (PMC5993822)
Supplement: 41422_2018_23_MOESM6_ESM.pdf [file 41422_2018_23_MOESM6_ESM.pdf]

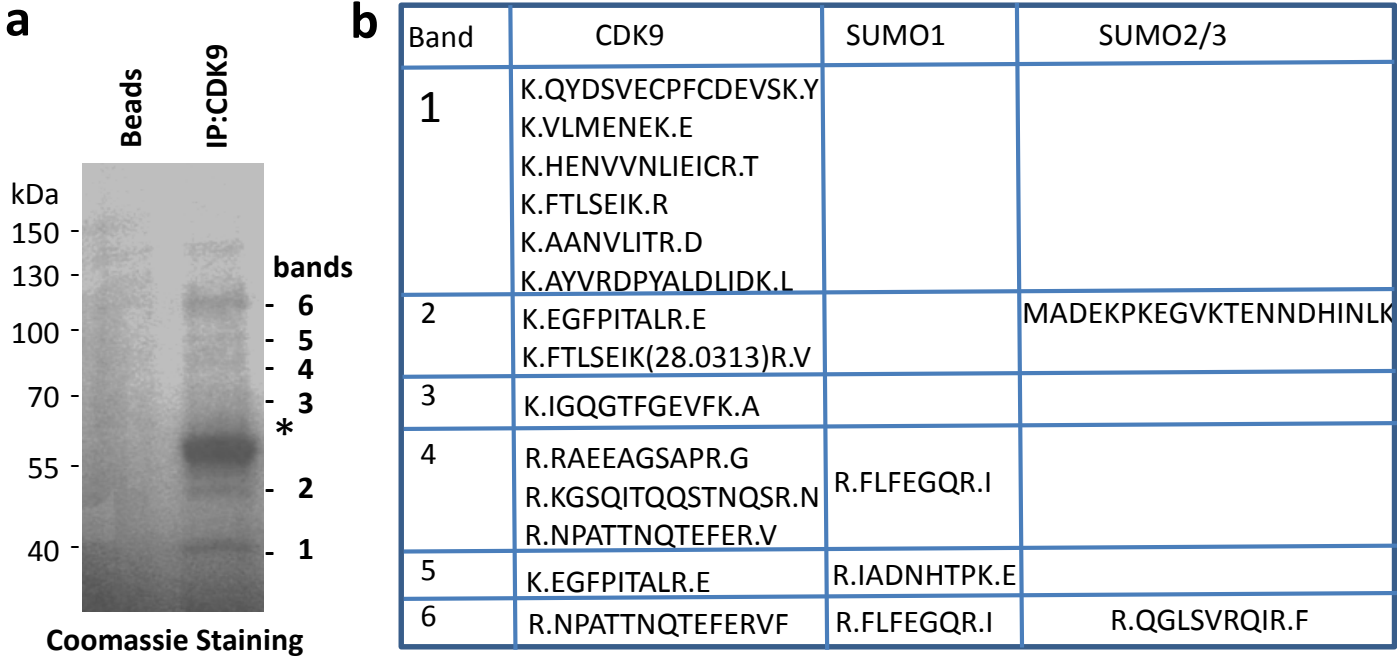

**c**

Consensus SUMO sites in CDK9

18  
SKYE

74  
LKHE

264  
EKLE

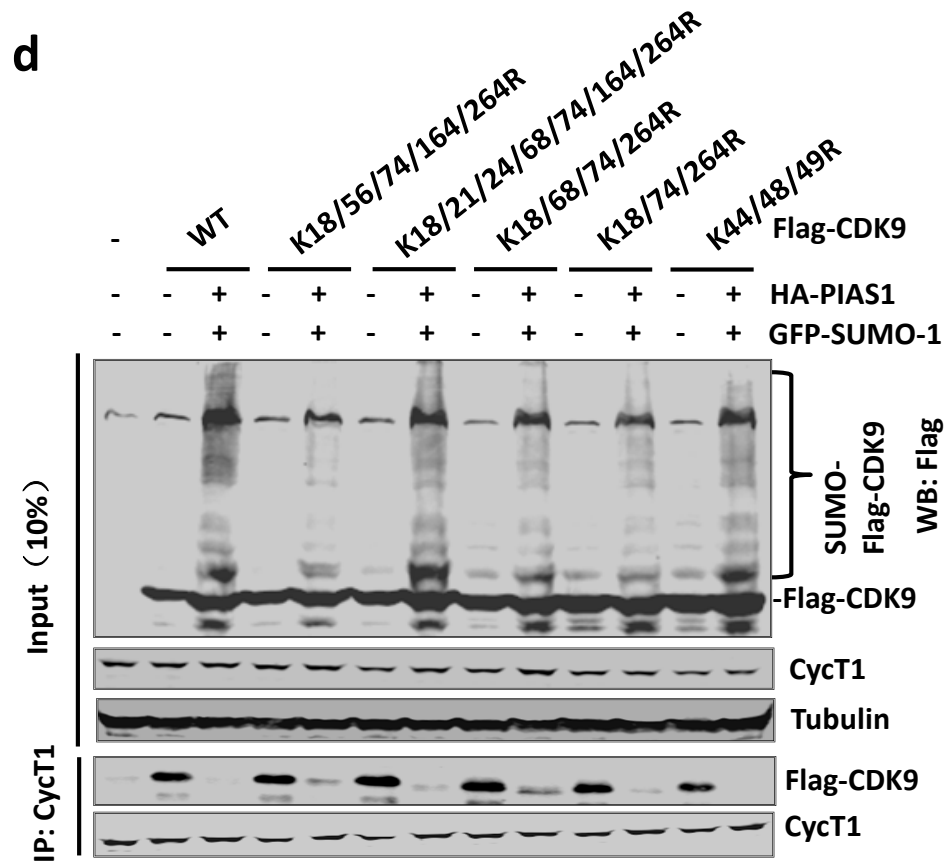

**Supplementary Figure 6.** CDK9 sumoylation occurs redundantly at multiple sites. **(a)** Coomassie blue staining showing multiple bands (1 to 6) were immunoprecipitated from HeLa cell extracts by anti-CDK9 antibody (Santa Cruz, #sc-484). “\*”, IgG heavy chain. **(b)** Bands 1-6 were excised from the gel, digested with trypsin, and subjected to mass spectrometry analysis. The identified CDK9 peptides from each band were listed. Also listed were peptide sequences derived from SUMO-1 or SUMO2/3. **(c)** Three consensus SUMO sites in human CDK9. **(d)** Various CDK9 mutants with specific lysine (K) residues changed to R were expressed in 293T cells and tested for sumoylation and interaction with Cyc T1. Note that all mutants could be sumoylated and their interaction with endogenous Cyc T1 was inhibited upon expression of PIAS1/SUMO-1. Thus, CDK9 sumoylation can occur at multiple and redundant sites.
