# Supplementary material
Source: PubMed Central journal article supplement (PMC5993822)
Supplement: 41422_2018_23_MOESM7_ESM.pdf [file 41422_2018_23_MOESM7_ESM.pdf]

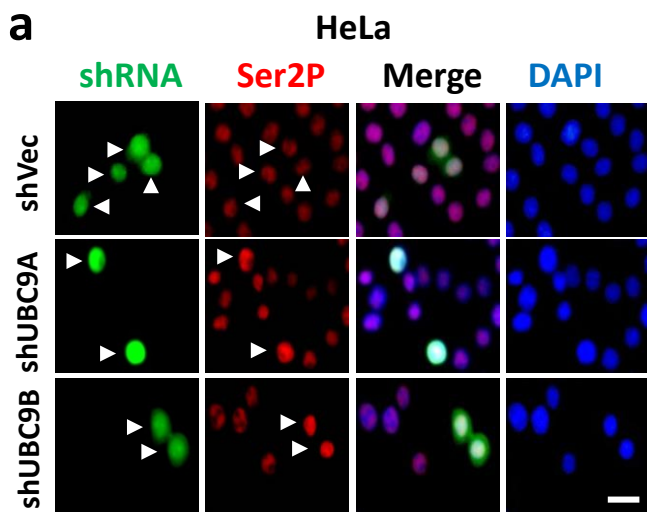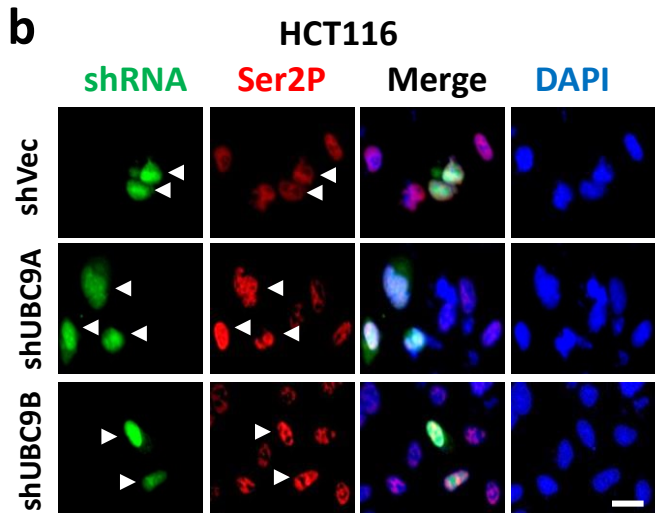

**Supplementary Figure 7.** UBC9 knockdown results in elevated levels of Ser2P of Pol II CTD. IF staining showing that knockdown of UBC9 in HeLa (**a**) or HCT116 cells (**b**) resulted in elevated levels of Ser2P in shRNA transfected cells (marked by arrows).
