# Supplementary material
Source: PubMed Central journal article supplement (PMC5993822)
Supplement: 41422_2018_23_MOESM10_ESM.pdf [file 41422_2018_23_MOESM10_ESM.pdf]

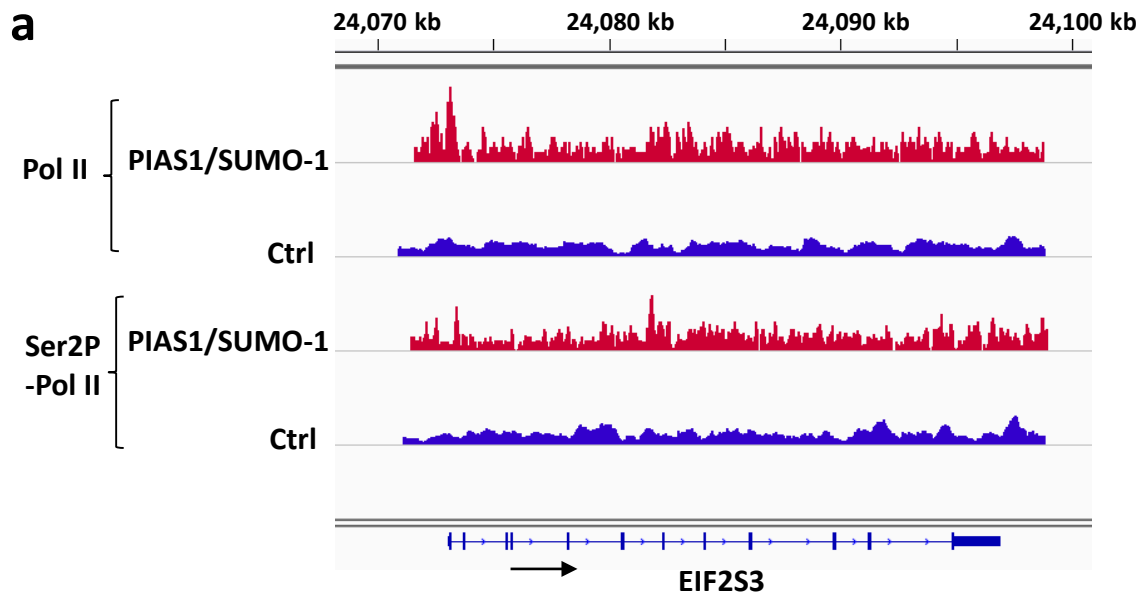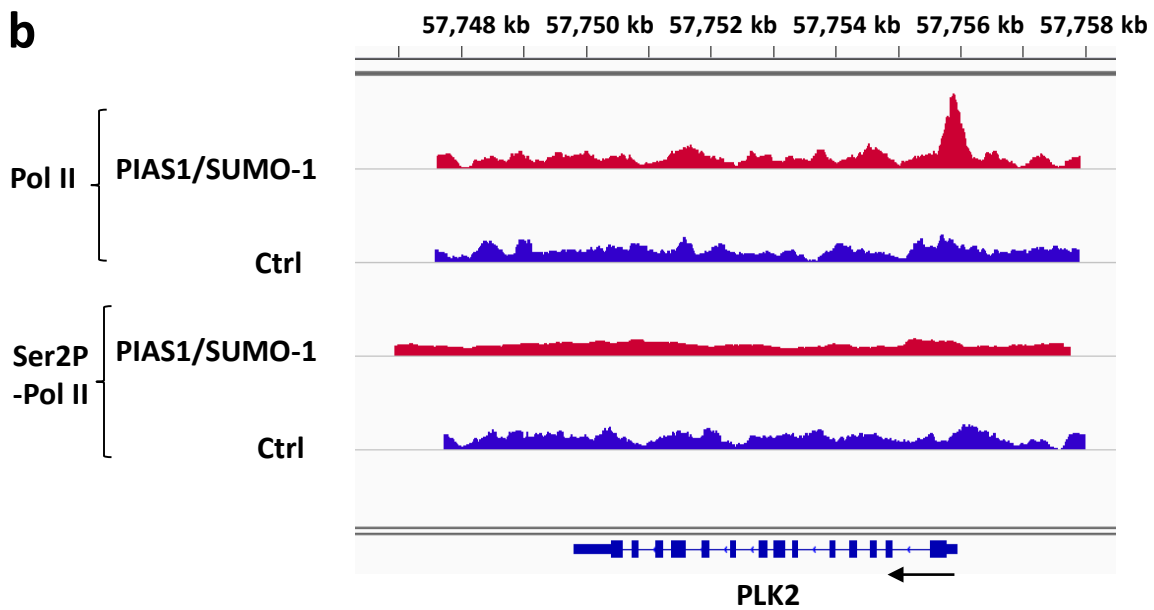

**Supplementary Figure 10.** UCSC genome browser views of Pol II and Ser2P ChIP-seq data at EIF2S3 (**a**) and PLK2 (**b**) gene loci. Arrow indicates the direction of transcription. Note significantly increased paused Pol II at the 5' ends for both genes.
