# Supplementary material
Source: PubMed Central journal article supplement (PMC5993822)
Supplement: 41422_2018_23_MOESM11_ESM.pdf [file 41422_2018_23_MOESM11_ESM.pdf]

**a** Enriched GO terms

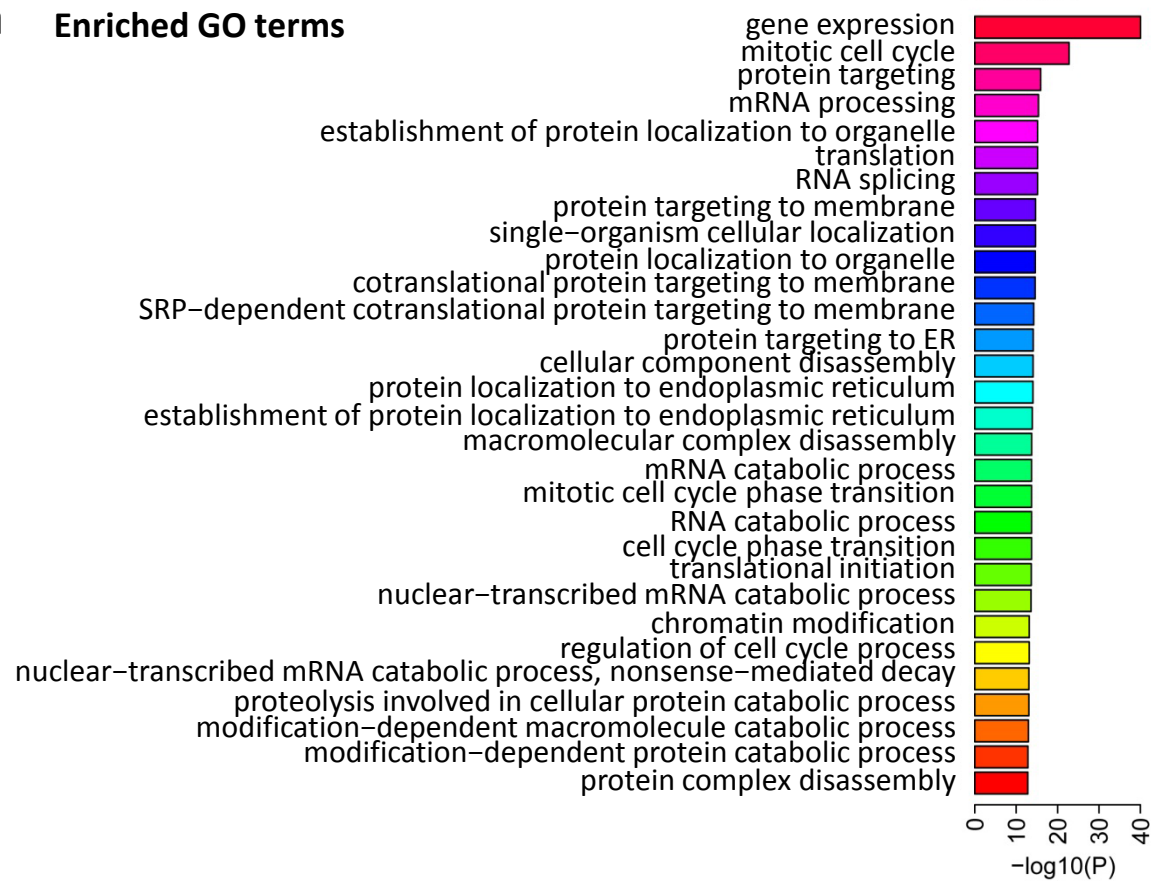

**b** Enriched Pathways

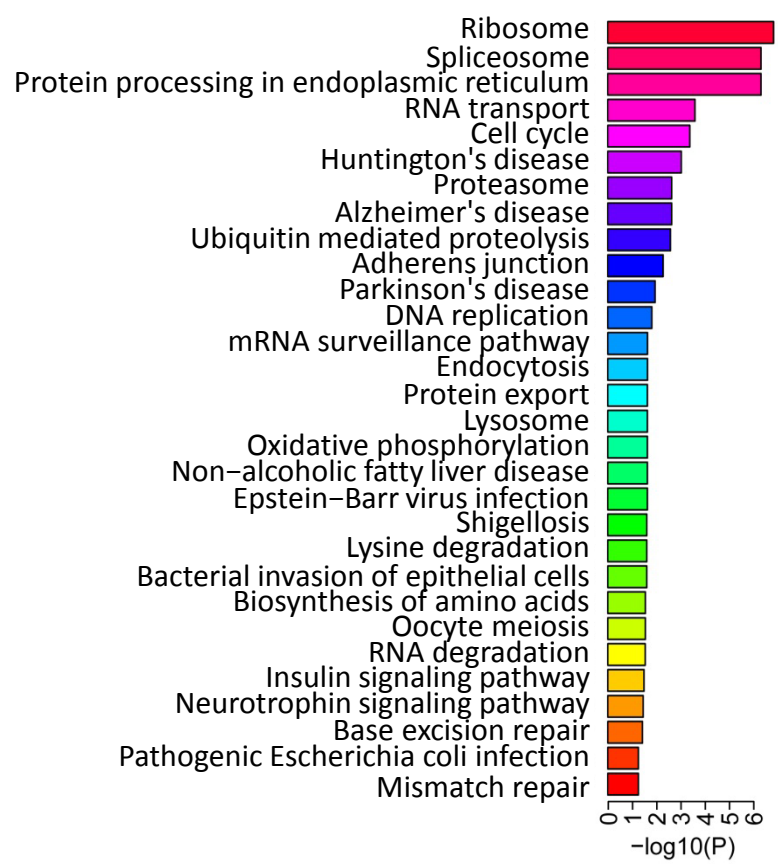

**Supplementary Figure 11.** Gene Ontology analysis of the overlapped genes between PIAS1/SUMO-1 most repressed class and UBC9 knockdown most up-regulated class. **(a)** GO term for biological processes. **(b)** Go term for pathways.
