# Supplementary material
Source: PubMed Central journal article supplement (PMC5993822)
Supplement: 41422_2018_23_MOESM13_ESM.pdf [file 41422_2018_23_MOESM13_ESM.pdf]

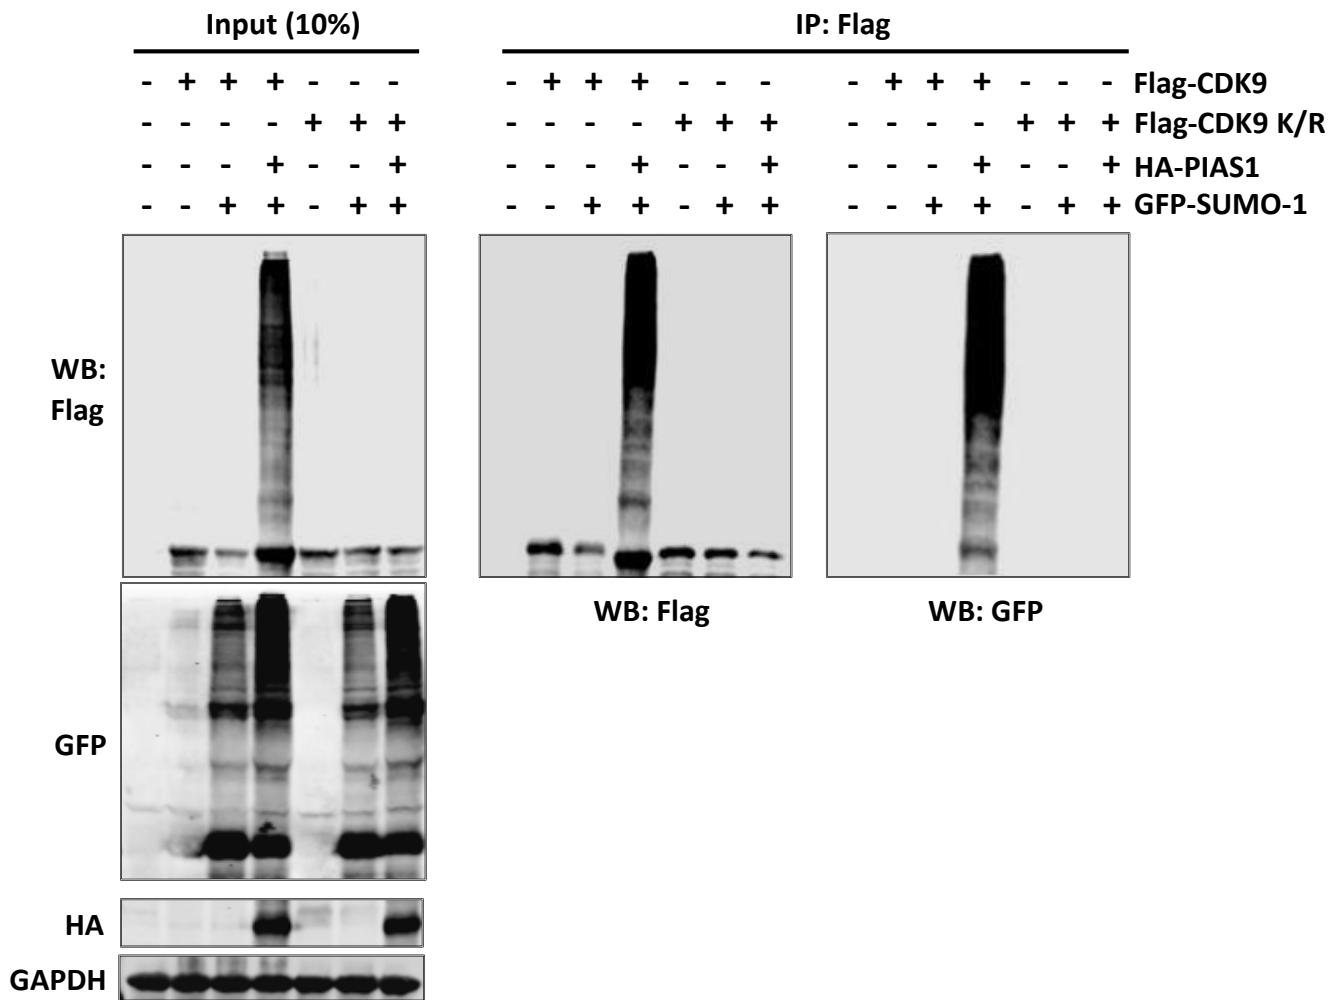

**Supplementary Figure 13.** Sumoylation of Flag-CDK9 is not due to the presence of Flag tag. The plasmid encoding Flag-CDK9 or Flag-CDK9K/R was co-transfected with or without HA-PIAS1 and GFP-SUMO-1 into HEK293T cells as indicated. Two days after transfection, the cell extracts were prepared and subjected to IP with anti-Flag antibody and WB analysis using antibodies as indicated. Note no sumoylation was observed for Flag-CDK9K/R mutant, thus ruling out the possibility that the observed sumoylation of Flag-CDK9 is due to sumoylation of Flag tag.
